# Supplementary material
Source: PubMed Central journal article supplement (PMC3769882)
Supplement: neo1509_1028SD1.pdf [file neo1509_1028SD1.pdf]

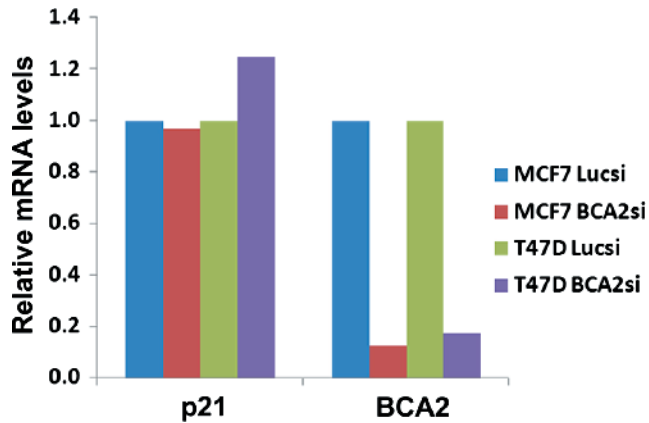

**Figure W1.** BCA2 knockdown in MCF-7 and T47D does not significantly affect the *p21* mRNA levels. MCF-7 and T47D cells were transfected with Luc siRNA or BCA2 siRNA#A for 72 hours. Total RNAs were prepared from cultured cells using TRIzol reagents. RT of 1  $\mu$ g of total RNA was performed using the iScript cDNA Synthesis Kit. SYBR Select Master Mix (ABI, Catalog No. 4472908) was used for quantitative RT-PCR in an ABI-7900 HT machine. The primers are the same with the RT-PCR. Quantitative PCR on cDNA products was performed using the following parameters: pre-denaturation at 95°C for 2 minutes, 95°C for 15 seconds, annealing at 60°C for 1 minute, running 40 cycles. The mRNA levels of *BCA2* and *p21* were analyzed using the  $\Delta\Delta C_t$  method. *GAPDH* was used as the loading control.

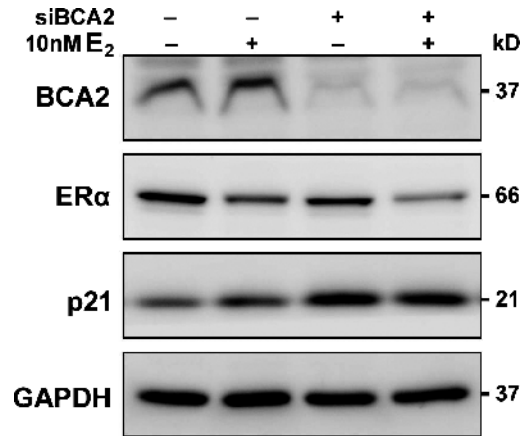

**Figure W2.** BCA2 regulates p21 protein levels independent of estradiol ( $E_2$ ). MCF-7 cells were cultured in hormone-free media for 48 hours and transiently transfected with siLuc and siBCA2 siRNA, as indicated. Forty-eight hours later, the cells were treated with ethanol as control or 10 nM  $\beta$ -estradiol ( $E_2$ ) for 24 hours and collected and subjected to WB analysis. Protein levels of p21, ER $\alpha$ , and BCA2 are shown.
